# Supplementary material for: FKBP52 regulates TRPC3-dependent Ca2+ signals and the hypertrophic growth of cardiomyocyte cultures
Source: Oxford University Press journal article supplement (doi:10.1242/jcs.231506), 2019-09-20
Supplement: jcs231506supp.pdf [file jcs231506supp.pdf]

```

mFKBP52 Atgaccgcccaggagatgaaggcggcgagaaacggggcgagtcggcccccctgcctctc 60
FKBP52 clone M T A E E M K A A E N G A Q S A F L F L 20
gaaggagtggacatcagcccaaacaggacgagggcgctcaaggtcatcaagagagag 120
E G V D I S P K Q D E G V L K V I K R E 40
ggtacaggcagagaccccatgatcggggcggagctttttgtccactacactggctgg 180
G T G T E T P M I G D R V F V H Y T G W 60
ctgctagatggcacaagtttgactccagctcggaccgaaaggacaattctcctttgac 240
L L D G T K F D S S L D R K D K F S F D 80
ctgggaaaaggggaggtcatcaaggcttgggatattgctgtgcaaccatgaaagtgagg 300
L G K G E V I K A W D I A V A T M K V G 100
gaagtgtgccacatcacctgcaagccagaatagcctatggcgcagcaggcagccctcg 360
E V C H I T C K P E Y A Y G A A G S P P 120
aagatcccccccaacgccaactgtatttgaagtgagctggttggagttcaaaaggagaa 420
tttgagttcaaaaggagaa 420
K I P P N A T L V F E V E L F E F K G E 140
gatcttacagaagaagaagatggcgggatccatccgcagaatccgactcgggggtaaggc 480
gatcttacagaagaagaagatggcgggatccatccgcagaatccgactcgggggtaaggc 480
D L T E E E D G G I I R R I R T R G E G 160
tatgcccagcccaatgatggtgctatggtggaagtggccctggaaggctaccacaaggac 540
tatgcccagcccaatgatggtgctatggtggaagtggccctggaaggctaccacaaggac 540
Y A R P N D G A M V E V A L E G Y H K D 180
cgctcttttgaccagcgggagctcgtcttgaagtcgggaaaggggaaagtctagatctg 600
cgctcttttgaccagcgggagctcgtcttgaagtcgggaaaggggaaagtctagatctg 600
R L F D Q R E L C F E V G E G E S L D L 200
ccctgtgggctggaggggccatcagccgatgggaaaggagagcattccatcgtgtac 660
ccctgtgggctggaggggccatcagccgatgggaaaggagagcattccatcgtgtac 660
P C G L E E A I Q R M B K G E H S I V Y 220
ctcaaacctagctatgcttttggcagtggtgggaaaggagaggttccagatcccaccgac 720
ctcaaacctagctatgcttttggcagtggtgggaaaggagaggttccagatcccaccgac 720
L K P S Y A F G S V G K E R F Q I P P H 240
gtcagctgaggtatgaaagtcggcgtgaaagctttgagaagccaaggagctctgggag 780
gtcagctgaggtatgaaagtcggcgtgaaagctttgagaagccaaggagctctgggag 780
A E L R Y E V R L K S F E K A K E S W E 260
atgagctcggcggagaagctggagcagacaaacatagtgaaagagaggggaccgcgtac 840
atgagctcggcggagaagctggagcagacaaacatagtgaaagagaggggaccgcgtac 840
M S S A E K L E Q S N I V K E R G T A Y 280
ttcaaggaaggcaagtacaagcagcgttactgcagtacaagaagatcgtgtcttggcta 900
ttcaaggaaggcaagtacaagcagcgttactgcagtacaagaagatcgtgtcttggcta 900
F K E G K Y K Q A L L Q Y K K I V S W L 300
gaatacaggtctagcttctccggtgaggaatgcaaaaggtccatgcactccgactggcc 960
gaatacaggtctagcttctccggtgaggaatgcaaaaggtccatgcactccgactggcc 960
E Y E S S F S G E E M Q K V H A L R L A 320
tcacacctcaatcggcattgttcacctgaaactcaggccttctcagctgccatcgaa 1020
tcacacctcaatcggcattgttcacctgaaactcaggccttctcagctgccatcgaa 1020
S H L N L A M C H L K L Q A F S A A I E 340
agctgcaacaaggccttggagctggacagcaacaacgagaagggcctgtttcgccgggga 1080
agctgcaacaaggccttggagctggacagcaacaacgagaagggcctgtttcgccgggga 1080
S C N K A L E L D S N N E K G L F R R/Q G 360
gagggcccactggcgtgaaatgactttgacctggcaagagctgacttccaaaaggtcctg 1140
gagggcccactggcgtgaaatgactttgacctggcaagagctgacttccaaaaggtcctg 1140
E A H L A V N D F D L A R A D F Q K V L 380
cagctctatcccagcaacaagccgcaagaccagctggctgtgtgccagcagcggacc 1200
cagctctatcccagcaacaagccgcaagaccagctggctgtgtgccagcagcggacc 1200
Q L Y F S N K A A K T Q L A V C Q Q R T 400
cgtaggcagctcggccgggaaaaaagctctatgccaacatgtttgagaggtggctgag 1260
cgtaggcagctcggccgggaaaaaagctctatgccaacatgtttgagaggtggctgag 1260
R R Q L A R E K K L Y A N M F E R L A E 420
gaggagcacaaggtgaaggcagaagtggcagcaggagacca tccactgatgctgagatg 1320
gaggagcacaaggtgaaggcagaagtggcagcaggagacca tccactgatgctgagatg 1320
E E H K V K A E V A A G D H P T D A E M 440
aaggtgagcggaa caatgtggcggagaaccagctcgggtggagacagaagcgtag 1377
aaggtgagcggaa caatgtggcggagaaccagctcgggtggagacagaagcgtag 1377
K G E R N N V A E N Q S R V E T E A *

```

**Fig. S1. Sequence alignment of mouse FKBP52 (mFKBP52) and the FKBP52 cDNA clone from the screen. Underlined sequences represent FKBP52 domains. The point mutation G1075A in the FKBP52 clone is marked in red.**

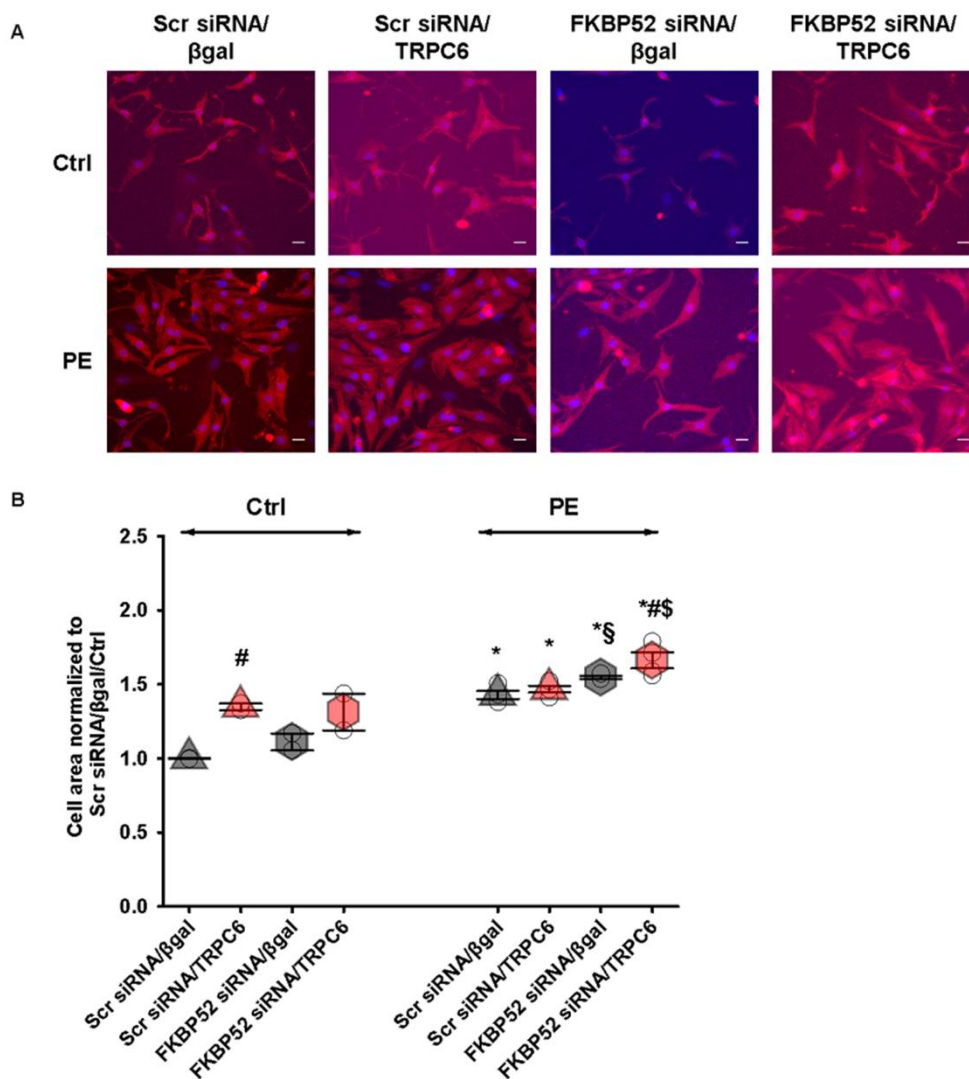

**Fig. S2. Downregulation of FKBP52 results in an elevated TRPC6-induced hypertrophic response.** (A) Neonatal rat cardiomyocytes (NRCs) were infected with adenoviruses encoding  $\beta$ gal or TRPC6 and transfected with FKBP52 (FKBP52 siRNA) or scramble siRNAs (Scr siRNA). The hypertrophic growth of NRCs was measured as an increase of the cell surface after phenylephrine (PE; 50  $\mu$ M) or control (Ctrl) stimulation for 24 h. Red,  $\alpha$ -actinin; Blue, DAPI. Scale bar: 20  $\mu$ m. Taken with a 40 $\times$  magnification objective. (B) Quantification of the cell area relative to Scr siRNA/ $\beta$ gal/Ctrl. \* $P$ <0.05 vs. respective Ctrl stimulation, # $P$ <0.05 vs. Scr siRNA/ $\beta$ gal/Ctrl or vs. FKBP52 siRNA/ $\beta$ gal/PE, respectively, \$ $P$ <0.05 vs. Scr siRNA/ $\beta$ gal/PE,  $\text{\textcircled{S}}$  $P$ <0.05 vs. FKBP52 siRNA/ $\beta$ gal/PE (two-way Anova with Holm-Sidak method and unpaired t-test),  $n = 2-4$ , mean  $\pm$  SEM.

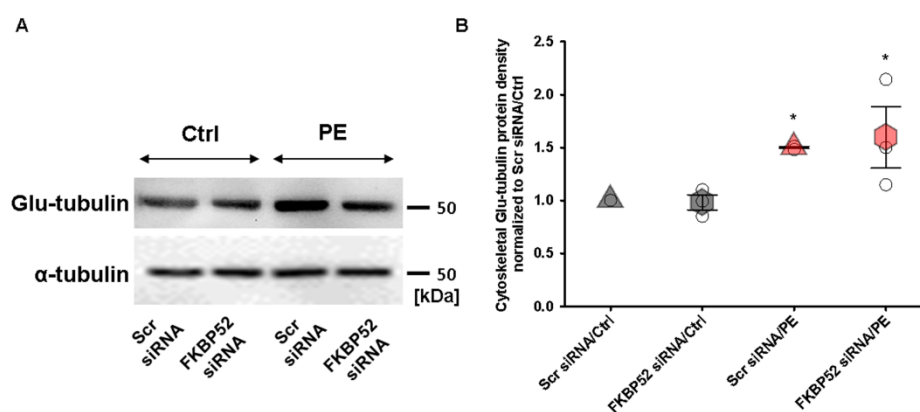

**Fig S3. The stabilization of microtubules is not affected by a downregulation of FKBP52 during hypertrophic stimulation.** (A) Western blot analysis of  $\alpha$ -tubulin and Glu-tubulin expression levels in cytoskeletal extracts from neonatal rat cardiomyocytes (NRCs) after 24 h of phenylephrine (PE) or control (Ctrl) stimulation. The cells were transfected with FKBP52 or scramble siRNAs (Scr siRNA). (B) PE stimulation results in increased Glu-tubulin expression levels in FKBP52 and scr siRNA-treated NRCs. Protein expression levels were normalized to scr siRNA/Ctrl. \* $P < 0.05$  vs. to scr siRNA/Ctrl or FKBP52 siRNA /Ctrl, respectively (two-way Anova with Holm-Sidak method),  $n = 3$ , mean  $\pm$  SEM.

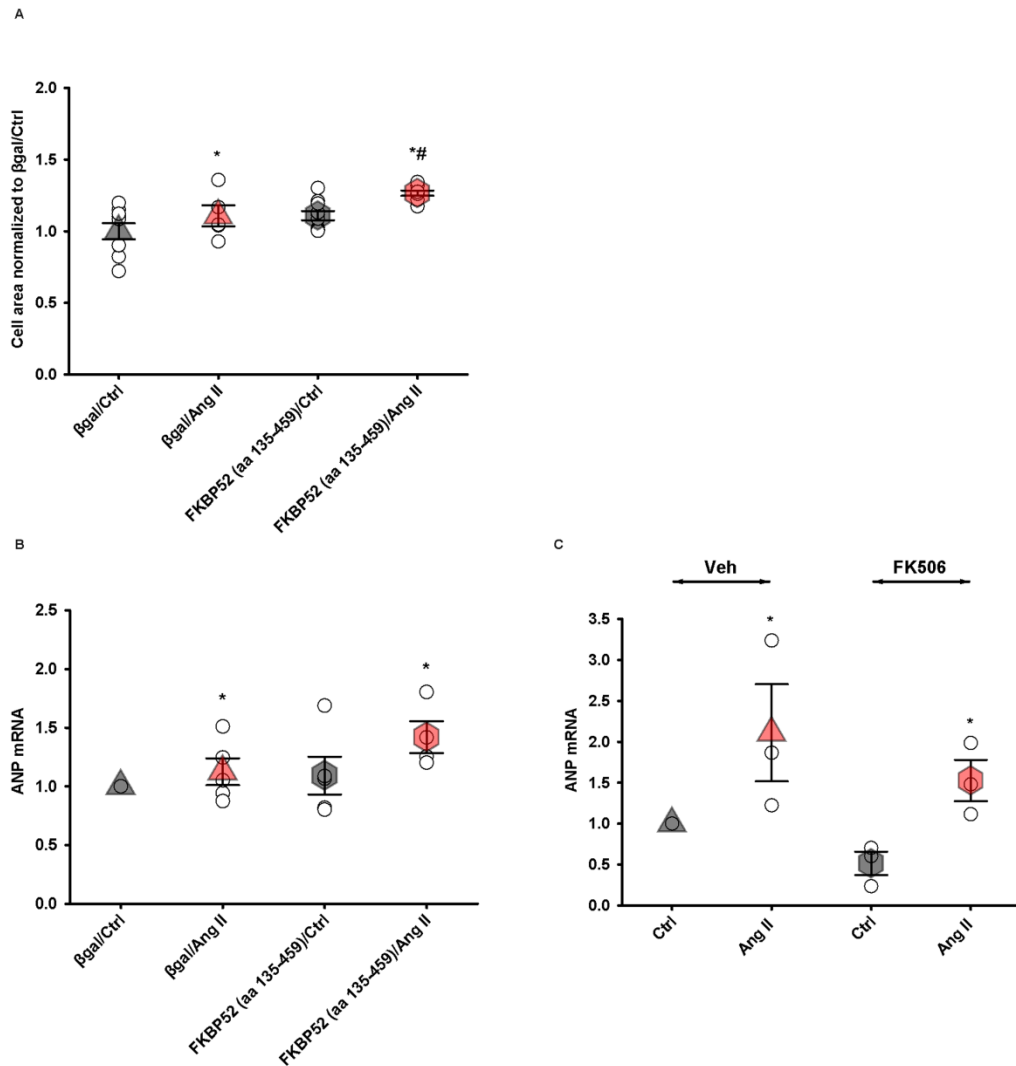

**Fig S4. FKBP52 (aa 135-459) affects an angiotensin II-stimulated hypertrophic response differently than FK506.** (A) Quantification of the cell area after 24 h of angiotensin II (Ang II; 100 nM) or control (Ctrl) stimulation. NRCs were infected with FKBP52 (aa 135-459) or  $\beta$ gal. Data are shown relative to  $\beta$ gal-infected controls. \* $P$ <0.05 vs.  $\beta$ gal/ctrl, # $P$ <0.05 vs.  $\beta$ gal/Ang II (two-way Anova with Holm-Sidak method),  $n = 5-9$ , mean  $\pm$  SEM. (B) mRNA levels of atrial natriuretic peptide (ANP) were determined after 24 h of Ang II or control (Ctrl) stimulation *via* qPCR from NRCs expressing  $\beta$ gal or FKBP52 (aa 135-459). \* $P$ <0.05 vs.  $\beta$ gal or FKBP52 (aa 135-459)/ctrl (two-way Anova with Holm-Sidak method),  $n = 4-5$ , mean  $\pm$  SEM. (C) mRNA levels from NRCs treated with FK506 (2  $\mu$ M) or vehicle (Veh). \* $P$ <0.05 vs. Ctrl (two-way Anova with Holm-Sidak method),  $n = 3$ , mean  $\pm$  SEM. \* $P$ <0.05.

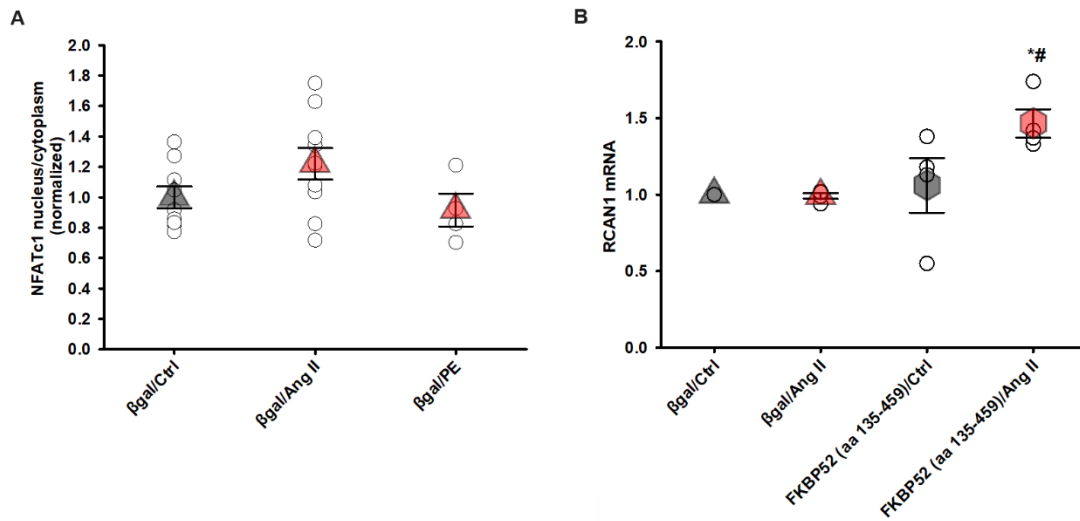

**Fig. S5. NFATc1 and RCAN1 activation in response to agonist stimulation in neonatal rat cardiomyocytes.** (A) Average quantified values of NFATc1-GFP localized to the nucleus in response to angiotensin II (Ang II; 100 nM), phenylephrine (PE; 50  $\mu$ M) or control (Ctrl) stimulation. Neonatal rat cardiomyocytes (NRCs) were infected with  $\beta$ gal. Data are shown relative to  $\beta$ gal/Ctrl (One-way Anova with Holm-Sidak method),  $n = 4-10$ , mean  $\pm$  SEM. (B) Regulator of calcineurin 1 (RCAN1) expression levels as parameter of the activation of calcineurin in NRCs. mRNA levels of RCAN1 were measured after 24 h of Ang II or control (Ctrl) stimulation *via* qPCR. NRCs were infected with  $\beta$ gal or FKBP52 (aa 135-459). Average quantified values relative to  $\beta$ gal/Ctrl. \* $P < 0.05$  vs. FKBP52 (aa 135-459)/Ctrl, # $P < 0.05$  vs.  $\beta$ gal/ Ang II (two-way Anova with Holm-Sidak method),  $n = 4$ , mean  $\pm$  SEM.

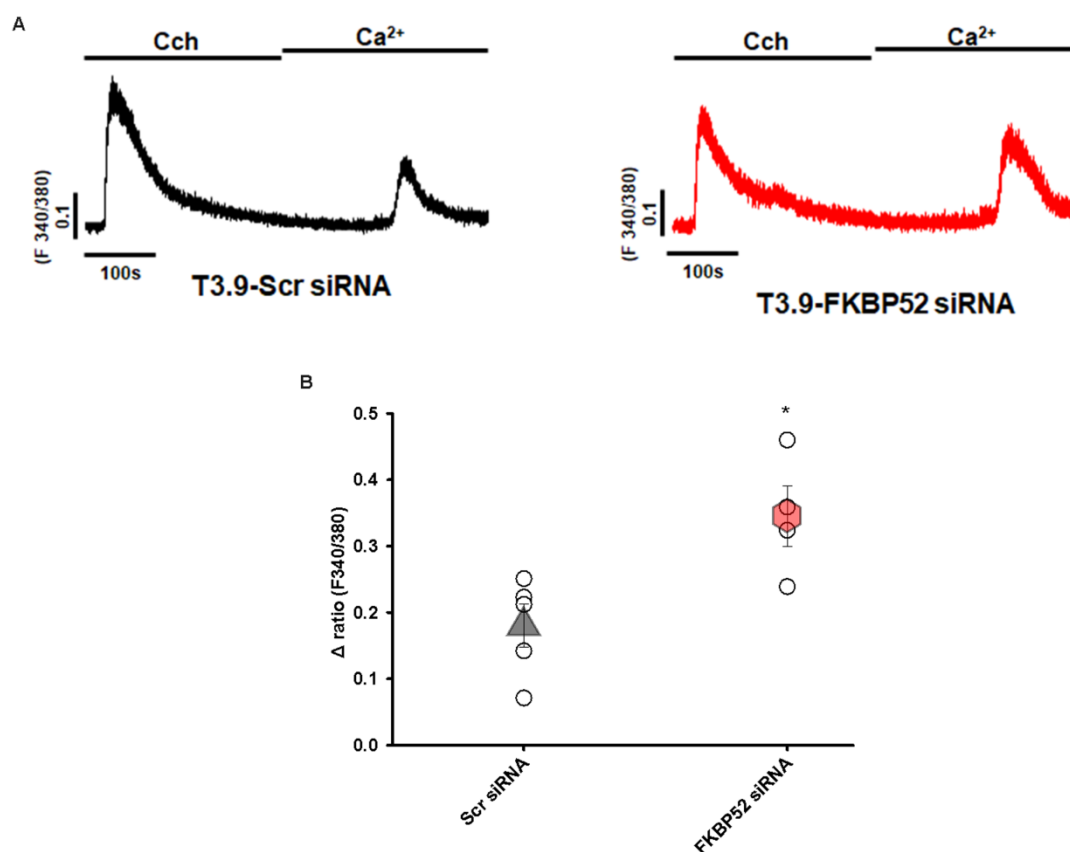

**Fig. S6. TRPC3-dependent Ca<sup>2+</sup> signals in HEK 293 cells are dependent on FKBP52.** (A) Representative Ca<sup>2+</sup> recordings of HEK 293 cells stably expressing TRPC3 (T3.9). The cells were treated with scramble (Scr siRNA) or FKBP52 siRNAs. A TRPC3-related Ca<sup>2+</sup> influx was measured according to a classical Ca<sup>2+</sup> re-addition protocol. T3.9 cells were first stimulated with the G<sub>q</sub> protein-coupled receptor agonist carbachol (Cch, 300 μM) in nominally Ca<sup>2+</sup>-free conditions and subsequently perfused with an external solution containing CaCl<sub>2</sub>. This manoeuvre resulted in a Cch-dependent Ca<sup>2+</sup> release from internal stores followed by a Ca<sup>2+</sup> influx from the extracellular space. The TRPC3-mediated Ca<sup>2+</sup> influx was significantly enhanced in cells treated with siRNAs against FKBP52. (B) Mean Δ ratio values were calculated by subtracting the peak value after Ca<sup>2+</sup> re-addition from the baseline value \*P<0.05 vs. Scr siRNA (unpaired t-test), *n* = 4-5, mean ± SEM. The mean Δ ratio of the Ca<sup>2+</sup> release (peak-baseline) was not different between the groups. P= 0.34.
